# Supplementary material for: Treatment Patterns and Healthcare Resource Utilization Among Patients with Atopic Dermatitis: A Retrospective Cohort Study Using German Health Claims Data
Source: Springer Nature journal article supplement (doi:10.1007/s13555-022-00773-3), 2022-07-24
Supplement: MOESM1 [file 23299462]

## **SUPPLEMENTARY MATERIAL**

### **Title:**

### **Treatment patterns and healthcare resource utilization among patients with atopic dermatitis – a retrospective cohort study using German health claims data**

Marie Schild <sup>1\*</sup>, Valeria Weber <sup>2\*</sup>, Diamant Thaçi<sup>3</sup>, Agnes Kisser <sup>1</sup>, Wolfgang Galetzka <sup>4</sup>, Dirk Enders <sup>4</sup>, Franziska Zügel <sup>1</sup>, Christoph Ohlmeier <sup>2</sup>, Holger Gothe <sup>2,5,6</sup>

\* Contributed equally to this work

<sup>1</sup> *Pfizer in Germany, Linkstraße 10, 10785 Berlin, Germany*

<sup>2</sup> *IGES Institut GmbH, Friedrichstr. 180, 10117 Berlin, Germany*

<sup>3</sup> *Institute and Comprehensive Center for Inflammation Medicine, University of Luebeck, Ratzeburger Allee 160, 23538 Luebeck, Germany*

<sup>4</sup> *InGef - Institute for Applied Health Research Berlin GmbH, Spittelmarkt 12, 10117 Berlin, Germany*

<sup>5</sup> *Department of Health Sciences / Public Health, Medical Faculty, TU Dresden, Fetscherstraße 74, 01307 Dresden, Germany*

<sup>6</sup> *Department of Public Health, Health Services Research and HTA, UMIT, Eduard-Wallnöfer-Zentrum 1, 6060 Hall in Tirol, Austria*

*Corresponding author:*

*Holger Gothe, MD*

*IGES Institut GmbH*

*Friedrichstr. 180*

*10117 Berlin*

*Email: holger.gothe@iges.com*

*Phone: +49 30 230 809 91*

**Table S1** Operationalization of overall comorbidity of the Elixhauser Comorbidity Score

| <b>Disease</b>                                   | <b>ICD-10-GM diagnosis code</b>                                                                              |
|--------------------------------------------------|--------------------------------------------------------------------------------------------------------------|
| Congestive heart failure                         | I099, I110, I130, I132, I255, I420, I425-I429, I43, I50, P290                                                |
| Cardiac arrhythmias                              | I441-I443, I456, I459, I47-I49, R000, R001, R008, T821, Z450, Z950                                           |
| Valvular disease                                 | A520, I05-I08, I091, I098, I34-I39, Q230-Q233, Z952-Z954                                                     |
| Pulmonary circulation disorders                  | I26, I27, I280, I288, I289                                                                                   |
| Peripheral vascular disorders                    | I70, I71, I731, I738, I739, I771, I790, I792, K551, K558, K559, Z958, Z959                                   |
| Hypertension (complicated)                       | I11-I13 , I15                                                                                                |
| Hypertension (uncomplicated)                     | I10                                                                                                          |
| Paralysis                                        | G041, G114, G801, G802, G81, G82, G830-G834, G839                                                            |
| Other neurological disorders                     | G10-G13, G20-G22, G254-G255, G312, G318, G319, G32, G35-G37, G40, G41, G931, G934, R470, R56                 |
| Chronic pulmonary disease                        | I278, I279, J40-J47, J60-J67, J684, J701, J703                                                               |
| Diabetes (complicated)                           | E102-E108, E112-E118, E122-E128, E132-E138, E142-E148                                                        |
| Diabetes (uncomplicated)                         | E100, E101, E109, E110, E111, E119, E120, E121, E129, E130, E131, E139, E140, E141, E149                     |
| Hypothyroidism                                   | E00-E03 , E890                                                                                               |
| Renal failure                                    | I120, I131, N18, N19, N250, Z490-Z492, Z940, Z992                                                            |
| Liver disease                                    | B18, I85, I864, I982, K70, K711, K713-K715, K717, K72, K74, K760, K762, K769, Z944                           |
| Peptic ulcer disease (excluding bleeding)        | K257, K259, K267, K269, K277, K279, K287, K289                                                               |
| AIDS / HIV                                       | B20-B24, B20-B22, B24                                                                                        |
| Lymphoma                                         | C81-C85, C88 , C96, C900, C902                                                                               |
| Metastatic cancer                                | C77, C78, C79, C80                                                                                           |
| Solid tumor without metastasis                   | C00-C14, C15-C26, C30-C39, C40-C41, C43, C45-C49, C50, C51-C58, C60-C63, C64-C68, C69-C72, C73-C75, C76, C97 |
| Rheumatoid arthritis/ collagen vascular diseases | L940, L941, L943, M05, M06, M08, M120, M123, M30, M310-M313 , M32, M33, M34, M35, M45, M461, M468, M469      |
| Coagulopathy                                     | D65, D66, D67, D68, D691, D693-D696                                                                          |
| Obesity                                          | E66                                                                                                          |
| Weight loss                                      | E40-E46, R634, R64                                                                                           |
| Fluid and electrolyte disorders                  | E222, E86, E87                                                                                               |
| Blood loss anemia                                | D500                                                                                                         |
| Deficiency anemias                               | D508, D509, D51-D53                                                                                          |
| Alcohol abuse                                    | F10, E52, G621, I426, K292, K700, K703, K709, T51, Z502, Z71, Z721                                           |
| Drug abuse                                       | F11 – F16, F18, F19, Z715, Z722                                                                              |
| Psychoses                                        | F20, F22-F25, F28, F29, F302, F312, F315                                                                     |
| Depression                                       | F204, F313-F315, F32, F33, F341, F412, F432                                                                  |

**Table S2** Operationalization of systemic drug therapy

|                                                         | <b>ATC code</b> | <b>OPS code</b> |
|---------------------------------------------------------|-----------------|-----------------|
| <b>Drug / Drug class</b>                                |                 |                 |
| <i>Agents for dermatitis, excluding corticosteroids</i> |                 |                 |
| Dupilumab                                               | D11AH05         | 6-00a.5         |
| <i>Systemic corticosteroids (SCS)</i>                   |                 |                 |
| Glucocorticoids*                                        | H02AB           |                 |
| Corticosteroids for systemic use, combinations *        | H02BX           |                 |
| <i>Immunosuppressants (SIS)</i>                         |                 |                 |
| Ciclosporin                                             | L04AD01         |                 |
| Azathioprine                                            | L04AX01         |                 |
| Methotrexate                                            | L04AX03         |                 |

\* Consideration of all subcodes under this code

**Table S3** Operationalization of concomitant TCS, TCI

| <b>Drug / Drug class</b>                        | <b>ATC code</b> |
|-------------------------------------------------|-----------------|
| <i>Topical corticosteroids (TCS)</i>            |                 |
| Corticosteroid, pure*                           | D07 A           |
| Corticosteroids, combinations with antiseptics* | D07 B           |
| Corticosteroids, combinations with antibiotics* | D07 C           |
| Corticosteroids, other combinations *           | D07 X           |
| <i>Topical calcineurin inhibitors (TCI)</i>     |                 |
| Tacrolimus                                      | D11AH01         |
| Pimecrolimus                                    | D11AH02         |

\* Consideration of all subcodes under this code

**Table S4** Operationalization of other AD-related medication

| <b>Drug / Drug class</b>                                | <b>ATC code</b> |
|---------------------------------------------------------|-----------------|
| <i>Agents for dermatitis, excluding corticosteroids</i> |                 |
| Tacrolimus                                              | D11AH01         |
| Pimecrolimus                                            | D11AH02         |
| Cromoglicic acid                                        | D11AH03         |
| Alitretinoin                                            | D11AH04         |
| Dupilumab                                               | D11AH05         |
| Crisaborole                                             | D11AH06         |
| <i>Corticosteroids, dermatological preparations</i>     |                 |
| Corticosteroids, plain*                                 | D07A            |
| Corticosteroids, combinations with antiseptics*         | D07B            |
| Corticosteroids, combinations with antibiotics *        | D07C            |
| Corticosteroids, other combinations*                    | D07X            |
| <i>Antipruritics</i>                                    |                 |
| Antihistamines for topical use*                         | D04AA           |
| Polidocanol                                             | D04AB11         |
| Polidocanol, combinations                               | D04AB61         |
| <i>Antifungals for dermatological, topical use*</i>     |                 |
|                                                         | D01A            |
| <i>Antibiotics and for topical use</i>                  |                 |
| Tetracycline and derivatives*                           | D06AA           |
| Other antibiotics for topical use*                      | D06AX           |
| <i>Emollients and protectives</i>                       |                 |
| Zinc products*                                          | D02AB           |
| Soft paraffin and fat products*                         | D02AC           |
| Carbamide                                               | D02AE01         |
| Carbamide, combinations                                 | D02AE51         |
| <i>Corticosteroids for systemic use</i>                 |                 |
| Glucocorticoids*                                        | H02AB           |
| Corticosteroids for systemic use, combinations *        | H02BX           |
| <i>Immunosuppressants</i>                               |                 |
| Ciclosporin                                             | L04AD01         |
| Azathioprine                                            | L04AX01         |
| Methotrexate                                            | L04AX03         |
| <i>Antihistamines for systemic use *</i>                | R06A            |

\* Consideration of all subcodes under this code

**Table S5** Distribution of index systemic drug therapy in 2017, stratified by sex

|                                                   | Female (n=5,762) |      | Male (n=4,213) |      | All (n=9,975) |      |
|---------------------------------------------------|------------------|------|----------------|------|---------------|------|
|                                                   | n                | %    | n              | %    | n             | %    |
| <b>Index systemic drug therapy</b>                |                  |      |                |      |               |      |
| Glucocorticoids                                   | 5,701            | 98.9 | 4,170          | 99.0 | 9,871         | 99.0 |
| Corticosteroids, fixed-dose combinations          | 31               | 0.5  | 9              | 0.2  | 40            | 0.4  |
| Cyclosporine                                      | 9                | 0.2  | 16             | 0.4  | 25            | 0.3  |
| Azathioprine                                      | 14               | 0.2  | 8              | 0.2  | 22            | 0.2  |
| Azathioprine and Glucocorticoids                  | < 5              | –    | 6              | 0.1  | 8             | 0.1  |
| Methotrexate                                      | < 5              | –    | < 5            | –    | < 5           | –    |
| Corticosteroids, combinations and Glucocorticoids | 0                | 0.0  | < 5            | –    | < 5           | –    |
| Cyclosporine and Glucocorticoids                  | < 5              | –    | < 5            | –    | < 5           | –    |
| Dupilumab                                         | 0                | 0.0  | 0              | 0.0  | 0             | 0.0  |

Numbers which are too low or might allow indirect calculability of too low case numbers cannot be displayed due to data protection reasons

**Table S6** Switching of index systemic drug therapy during the one-year observation period (n=9,975), 90 days gap allowed

| Index systemic drug therapy                             | n     | Drug switched to              | Patients switching |     | Days to switch |      |
|---------------------------------------------------------|-------|-------------------------------|--------------------|-----|----------------|------|
|                                                         |       |                               | n                  | %   | Mean           | SD   |
| Overall                                                 | 9,963 | Any other systemic medication | 51                 | 0.5 | 110.9          | 78.9 |
|                                                         | 9,963 | Azathioprine                  | 25                 | 0.3 | 115.8          | 90.0 |
|                                                         | 9,963 | Cyclosporine                  | 12                 | 0.1 | 110.3          | 61.7 |
|                                                         | 9,963 | Dupilumab                     | 9                  | 0.1 | 123.8          | 77.2 |
|                                                         | 9,963 | Systemic corticosteroids      | 5                  | 0.1 | 64.0           | 59.7 |
| Glucocorticoids,<br>Corticosteroids for<br>systemic use | 9,912 | Any other systemic medication | 44                 | 0.4 | 115.9          | 81.3 |
|                                                         | 9,912 | Azathioprine                  | 25                 | 0.3 | 115.8          | 90.0 |
|                                                         | 9,912 | Cyclosporine                  | 12                 | 0.1 | 110.3          | 61.7 |
|                                                         | 9,912 | Dupilumab                     | 7                  | 0.1 | 125.4          | 88.7 |
| Cyclosporine                                            | 25    | Any other systemic medication | < 5                | –   | –              | –    |
|                                                         | 25    | Dupilumab                     | < 5                | –   | –              | –    |
|                                                         | 25    | Systemic corticosteroids      | < 5                | –   | –              | –    |
| Azathioprine                                            | 22    | Any other systemic medication | < 5                | –   | –              | –    |
|                                                         | 22    | Dupilumab                     | < 5                | –   | –              | –    |
|                                                         | 22    | Systemic corticosteroids      | < 5                | –   | –              | –    |

Numbers which are too low or might allow indirect calculability of too low case numbers cannot be displayed due to data protection reasons  
SD Standard Deviation

**Table S7** Use of concomitant TCS and/or TCI during the one-year observation period, stratified by age

|                                                | 2-11 years (n=2,243) |      |          | 12-17 years (n=417) |      |          | ≥ 18 years (n=7,315) |      |          | All (n=9,975) |      |          |
|------------------------------------------------|----------------------|------|----------|---------------------|------|----------|----------------------|------|----------|---------------|------|----------|
|                                                | n                    | %    | Mean DDD | n                   | %    | Mean DDD | n                    | %    | Mean DDD | n             | %    | Mean DDD |
| <b>TCI</b>                                     |                      |      |          |                     |      |          |                      |      |          |               |      |          |
| Tacrolimus                                     | 33                   | 1.5  | 37.0     | 24                  | 5.8  | 29.6     | 343                  | 4.7  | 27.7     | 400           | 4.0  | 28.6     |
| Pimecrolimus                                   | 84                   | 3.7  | 30.1     | 20                  | 4.8  | 40.1     | 258                  | 3.5  | 30.3     | 362           | 3.6  | 30.8     |
| <b>TCS</b>                                     |                      |      |          |                     |      |          |                      |      |          |               |      |          |
| Corticosteroids, plain                         | 644                  | 28.7 | 47.5     | 134                 | 32.1 | 97.9     | 2,868                | 39.2 | 118.9    | 3,646         | 36.6 | 105.5    |
| Corticosteroids, combinations with antiseptics | 14                   | 0.6  | 19.8     | < 5                 | –    | –        | 112                  | 1.5  | 32.7     | 129           | 1.3  | 31.0     |
| Corticosteroids, combinations with antibiotics | 54                   | 2.4  | 20.4     | 12                  | 2.9  | 19.9     | 404                  | 5.5  | 25.8     | 470           | 4.7  | 25.1     |
| Corticosteroids, other combinations            | < 5                  | –    | –        | < 5                 | –    | –        | 175                  | 2.4  | 55.7     | 179           | 1.8  | 55.6     |

Numbers which are too low or might allow indirect calculability of too low case numbers cannot be displayed due to data protection reasons.

DDD Defined daily dose, TCI Topical Calcineurin Inhibitor, TCS Topical Corticosteroids
